# Supplementary material for: A comprehensive series of Irx cluster mutants reveals diverse roles in facial cartilage development
Source: Oxford University Press journal article supplement (doi:10.1242/dev.197244), 2021-08-02
Supplement: dev197244supp.pdf [file dev197244supp.pdf]

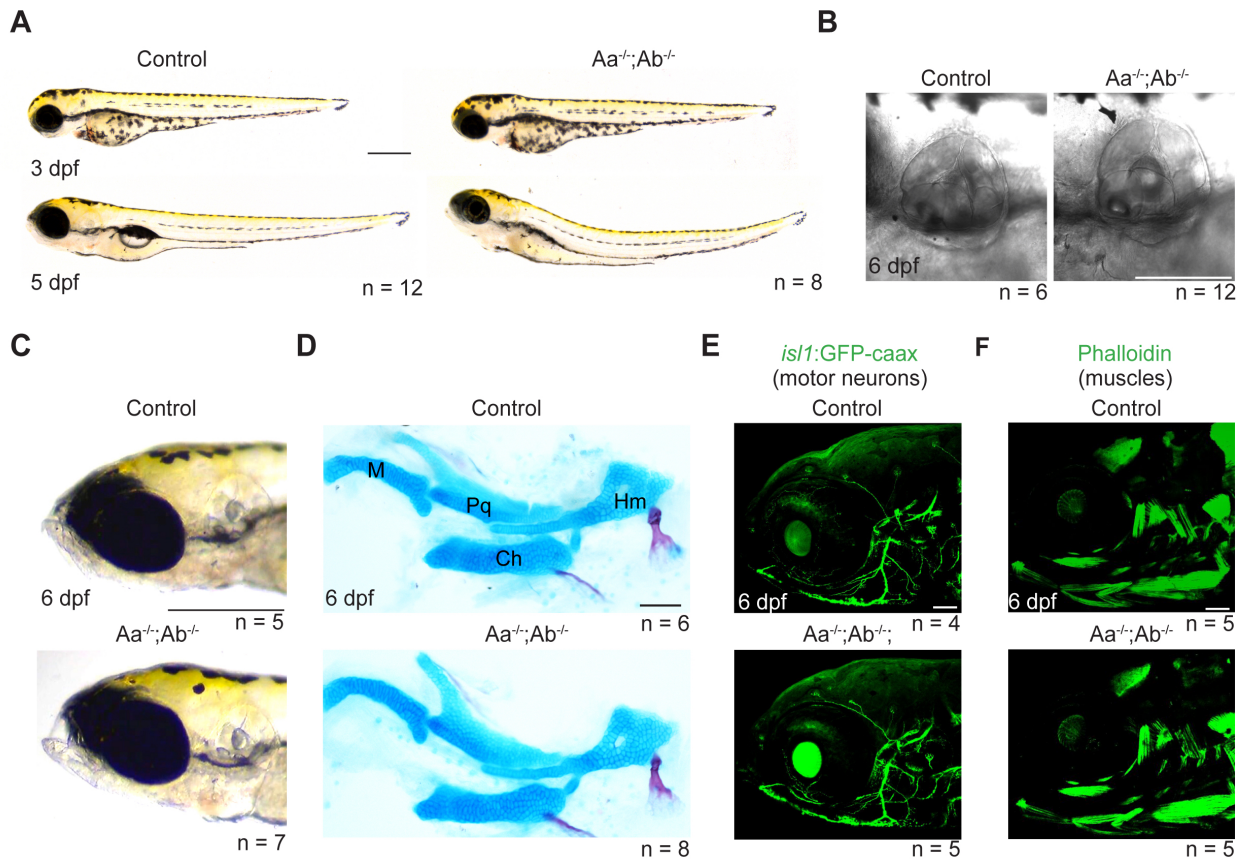

**Fig. S1. Dorsal curvature and jaw gape defects in absence of *IrxA* genes.** (A) Brightfield images show appearance of abnormal dorsal body curvature in *IrxAa<sup>-/-</sup>;IrxA<sup>b-/-</sup>* mutants between 3 and 5 dpf. (B) Differential interference contrast microscopy shows normal semicircular canals in controls and mutants. (C) *IrxAa<sup>-/-</sup>;IrxA<sup>b-/-</sup>* mutants display an abnormal jaw gape. (D) Alcian blue (cartilage) and Alizarin red (bone) staining reveals no defects in the facial skeleton of *IrxAa<sup>-/-</sup>;IrxA<sup>b-/-</sup>* mutants. Unilateral dissections of the skeletons from the first two arches are shown in lateral view. (E) Motor neurons imaged with *isl1:GFP-caax* are unaffected in mutant zebrafish. (F) Muscles imaged by phalloidin staining in control and mutant zebrafish are indistinguishable. Ch, ceratohyal; Hm, hyomandibular; M, Meckel's; Pq, palatoquadrate. Scale bars = 1 mm (A), 100  $\mu$ m (B-F).

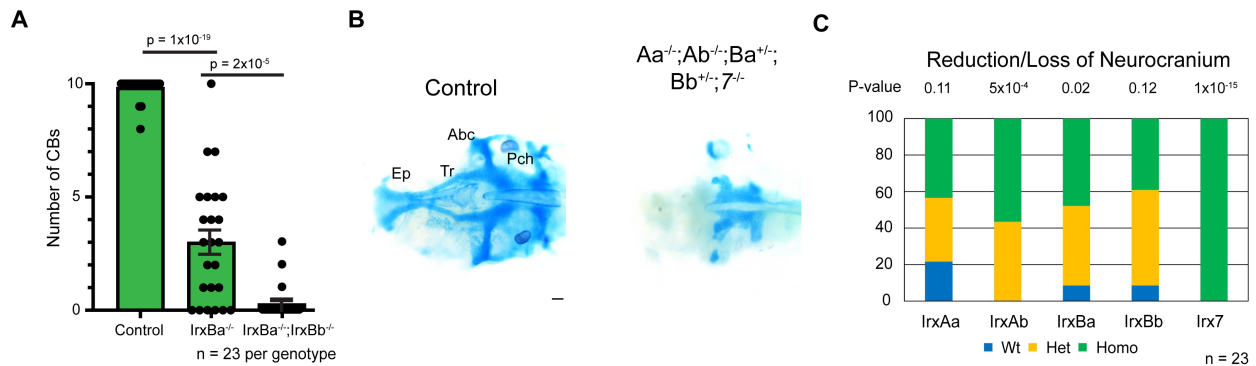

**Fig. S2. Ceratobranchial and neurocranial cartilage loss in *Irx* mutants.**

**(A)** Quantification of loss of ceratobranchial cartilages (CBs) at 5 dpf. Wild-type controls have 5 CBs per side, or 10 total. Homozygous loss of *IrxBb* exacerbates CB loss in *IrxBa* homozygous mutants. Data points represent individual embryos. P-values report t-test results, and error bars represent standard error of the mean. **(B)** Dorsal views of dissected neurocranial cartilages stained with Alcian blue at 4 dpf show severe loss of the neurocranium in combinatorial *Irx* mutants. **(C)** Summary of genotypes from a quintuple heterozygous incross that displayed reductions and/or loss of neurocranial cartilages. P-values report chi-square tests for deviation from the expected 1:2:1 wild-type:heterozygous:homozygous Mendelian ratio. Abc, anterior basicapsular commissure; Ep, ethmoid plate; Pch, parachordals; Tr, trabeculae. Scale bar = 100  $\mu$ m.

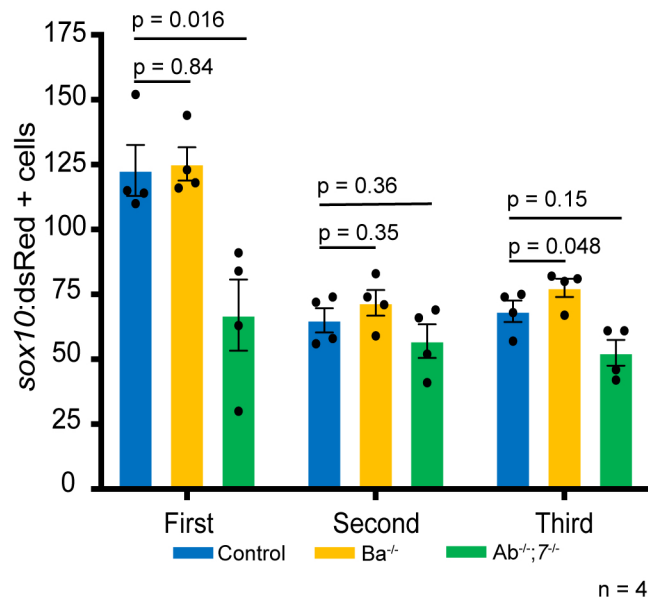

**Fig. S3. Quantification of cranial neural crest reductions in *lrx* mutants.** Quantification of the number of *sox10:dsRed*<sup>+</sup> cells within the first, second, and third neural crest streams at 16.5 hpf. Data points represent individual embryos. P-values were calculated using two-tailed non-parametric Student's t-test.

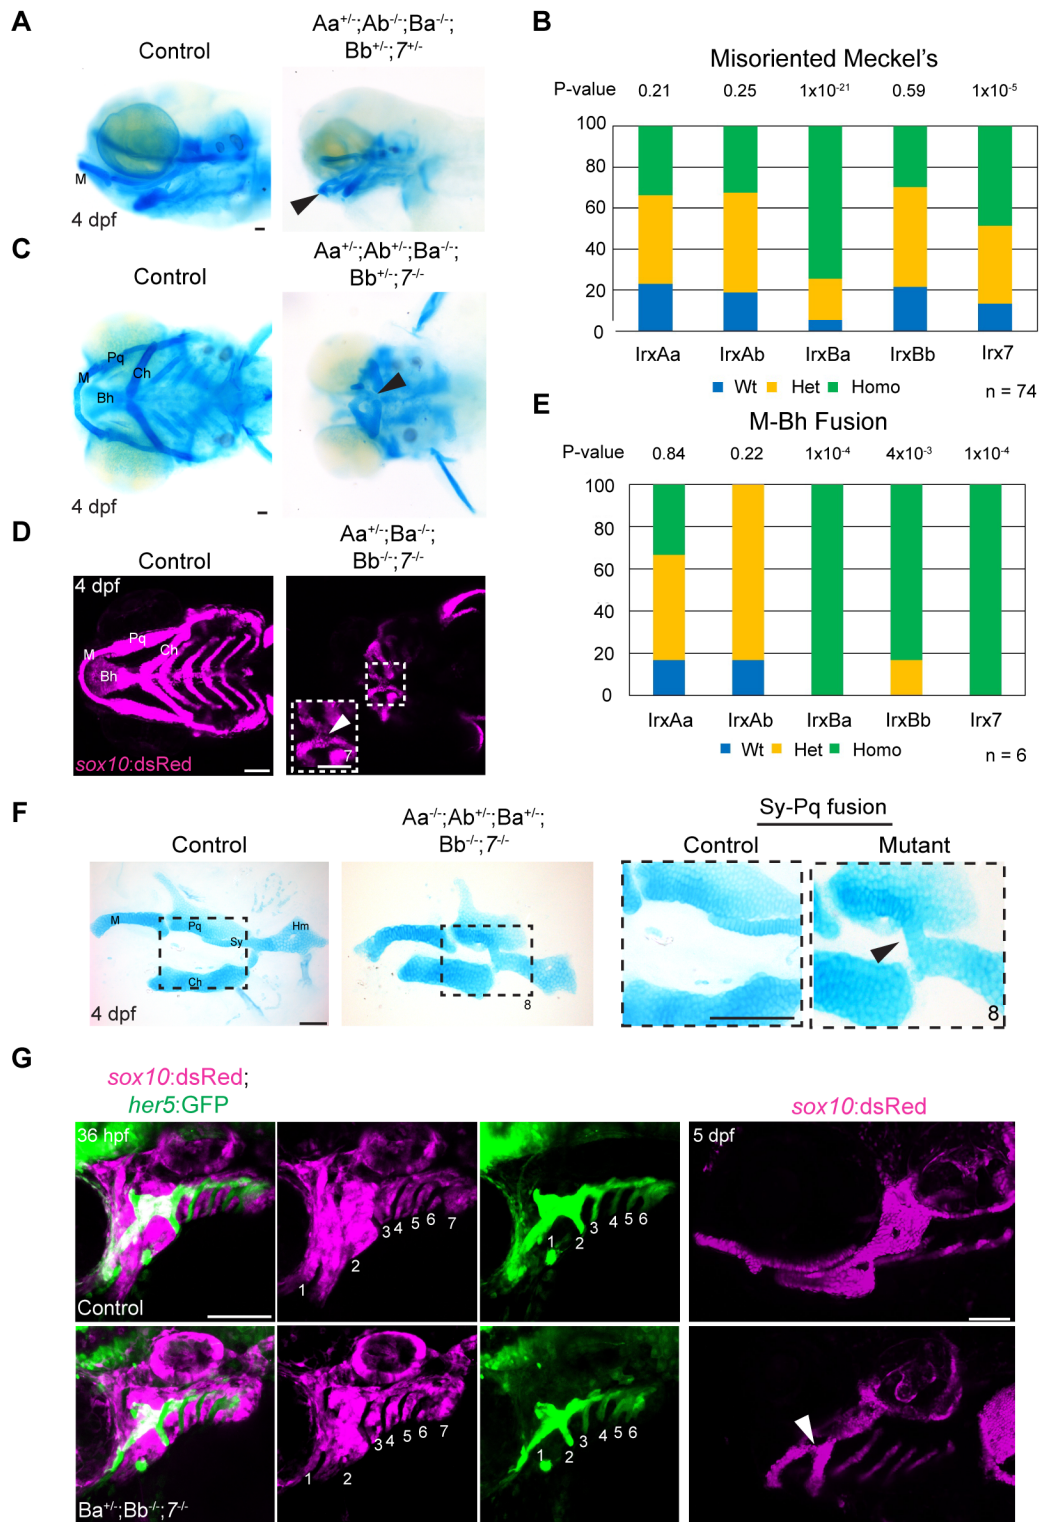

**Fig. S4. Additional facial defects in Irx mutants.**

(A) Lateral view of larval zebrafish heads stained with Alcian blue (cartilage). Arrowhead indicates misoriented Meckel's cartilage. (B) Summary of genotypes from a quintuple heterozygous incross for misoriented Meckel's cartilage. (C) Ventral view of larval zebrafish heads stained with Alcian



blue. Arrowhead indicates fusion of Meckel's cartilage with the basihyal cartilage. **(D)** Confocal images of *sox10:dsRed+* cartilages show severe reductions of facial cartilages and fusion of Meckel's and basihyal cartilages (arrowhead, inset corresponds to dashed box). **(E)** Summary of genotypes from a quintuple heterozygous incross for Meckel's-basihyal fusions. **(F)** Lateral view of dissected first and second arch cartilages shows fusion of the symplectic cartilage to the palatoquadrate in this *lrx* mutant. Dashed boxes show areas magnified at the right, and an arrowhead indicates the fusion site. **(G)** Confocal images of a wild-type control and combinatorial *lrx* mutant show a normal series of 7 pharyngeal arches containing *sox10:dsRed+* neural crest-derived cells separated by a series of 6 *her5:GFP+* endodermal pouches at 36 hpf. Re-imaging at 5 dpf (lateral view) shows inappropriate fusion of Meckel's and ceratohyal cartilages (arrowhead) in this individual mutant. P-values report chi-square tests for deviation from the expected 1:2:1 wild-type:heterozygous:homozygous Mendelian ratio. Bh, basihyal; Ch, ceratohyal; Hm, hyomandibula; M, Meckel's; Pq, palatoquadrate; Sy, symplectic; b, brain; e, endoderm. Scale bars = 100  $\mu$ m.

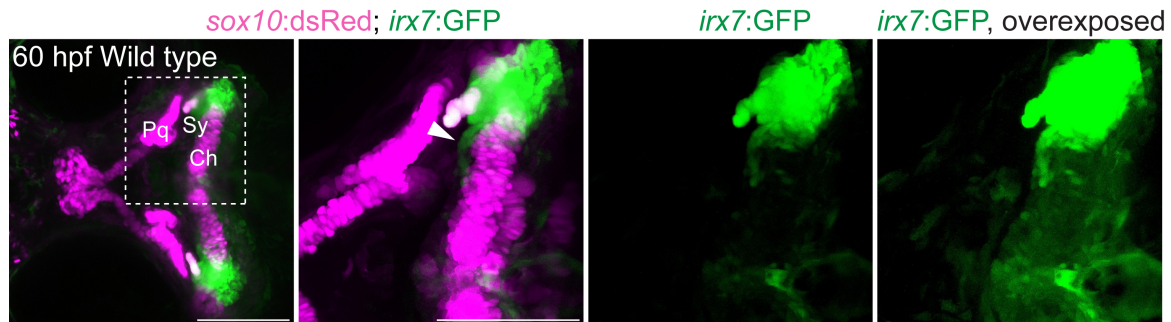

**Fig. S5. *irx7:GFP* expression in the ceratohyal perichondrium.**

Confocal imaging of *sox10:dsRed; irx7:GFP* embryos at 60 hpf shows strong *irx7:GFP* expression around the developing hyoid joint and symplectic cartilage. Weaker signal is also detected within the perichondrium (arrowhead) of the ceratohyal, in the same position where ceratohyal to Meckel's cartilage fusions are observed in mutants. Merged and individual channels corresponding to the boxed region are magnified to the right, with an overexposed version highlighting weaker expression. Ch, ceratohyal; Pq, palatoquadrate; Sy, symplectic. Scale bar = 100  $\mu$ m.

**Table S1. List of sgRNAs and genotyping assays for *lrx* mutant alleles.****Guide RNAs**

|       |                      |
|-------|----------------------|
| lrx1a | GGCCGCCGCTGCGGTGCCT  |
| lrx2a | GGGTAACCGGGACTCCCGTA |
| lrx4a | GGGTCTGCGCCGATGAGTCC |
| lrx1b | GCGTGCACTGCAAATCCTGG |
| lrx4b | GAGTTGCCATAGACCGCAGT |
| lrx3a | CGCCAGGAGGAGGCTAAAGA |
| lrx6a | GGAGTAGATGGCGGAGGGGT |
| lrx3b | GGTGCTGGTCTCTCGCGGG  |
| lrx5b | CCTGCGCGCGTTGGCGAACC |

**Primers**

| Gene  | Forward                | Reverse              | Enzyme  | Band Size | Digested Wild type | Mutant  |
|-------|------------------------|----------------------|---------|-----------|--------------------|---------|
| lrx1a | GGGAGTTCTGACTCCGTCGT   | TAAGGCAGAAAGGCGCTGTA | BsaJI   | 132       | 78, 54             | Uncut   |
| lrx2a | GAACATTTGACTGACCCCG    | CGTCTTCACTTTTATTCCGC | Cvi-QI  | 351       | 236 94, 21         | 238,113 |
| lrx4a | CATGACCACCAACTCTCTGACA | CGTACACCGGGCAGTACA   | None    | 95        | -                  | 90      |
| lrx1b | TATGGATAAAAACCGGGCGCA  | CCAGGGGTCGCAGTATGAG  | None    | 87        | -                  | 79      |
| lrx4b | ACGAAAGTAGGCTTGTGGCC   | GTAAGTGCTGCAGGAGTCGT | Acil    | 104       | 48, 56             | 104     |
| lrx3a | TGCTGGCCATCATCACTAAA   | ATCGATTTCTCTCGTCCT   | CviKI-1 | 191       | 123,62,6           | 185,6   |
| lrx5a | TGCTGGCTTTTGAGTGTTTG   | ATGGCCAGCATGATCTTCTC | BsaI    | 311       | 188,123            |         |
| lrx6a | GGACCCGCTTTATCTGGTGA   | GGGCAGAACTACGCCAACT  | None    | 97        | -                  | 72      |
| lrx3b | CCTTCTACCCATACGGACACC  | CAGGCCTTCAGGGTGCTGGT | None    | 91        | -                  | 83      |
| lrx5b | TCGCTTACAGTTCATCTGTGC  | CACGCACAATAACACCAAAA | BssHI   | 502       | 316,186            | 502     |
| lrx7  | GCCTGCTTCATCAACGGGG    | AAGGGATGAACTGTAGCCCG | EcoRV   | 176       | 111,65             | 176     |

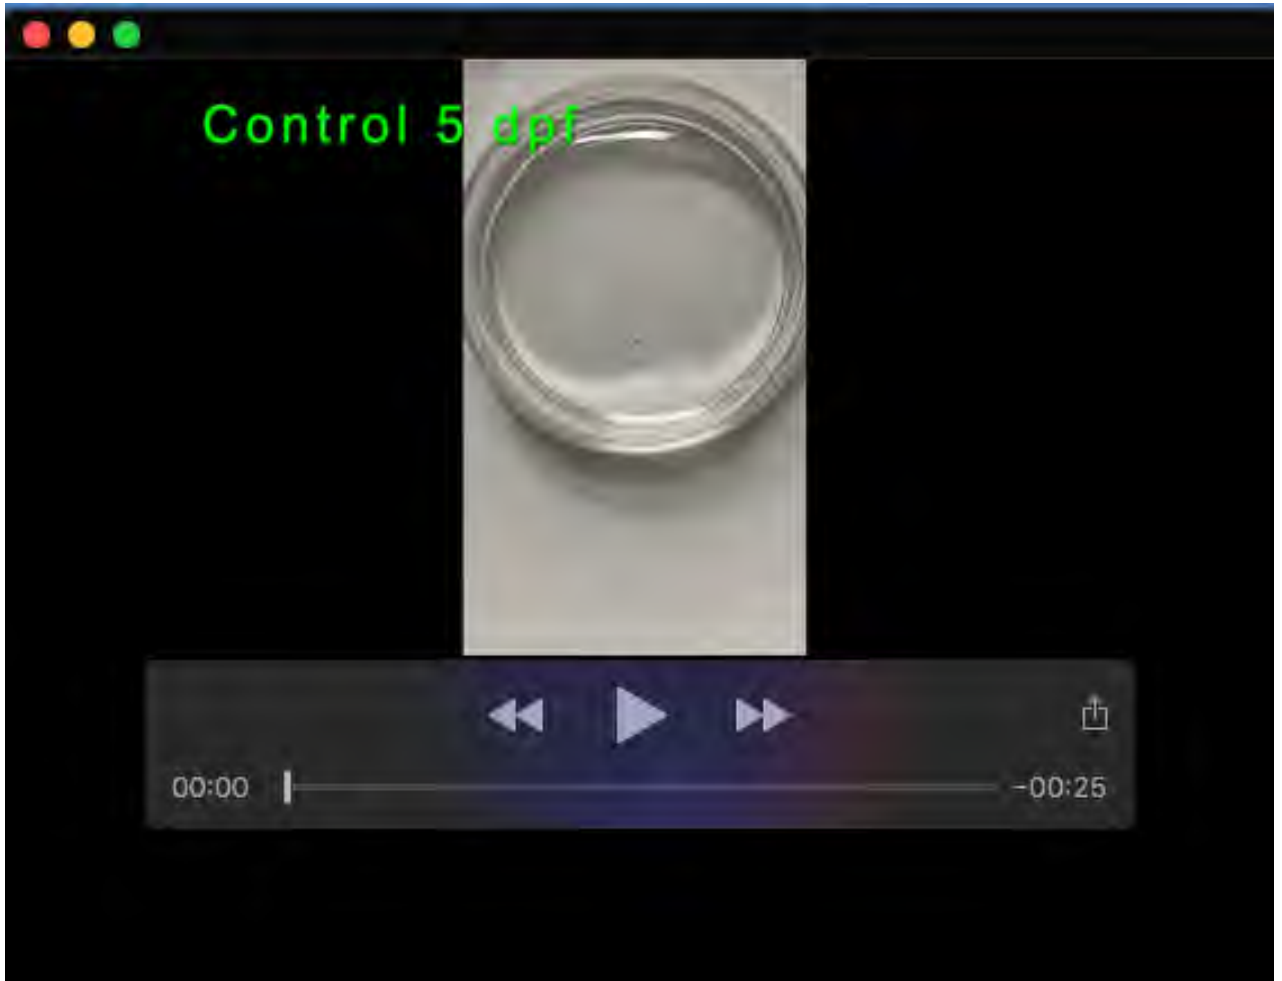

**Movie 1. Abnormal circling behavior in larvae and adults with *IrxAa* and *IrxAb* loss.**

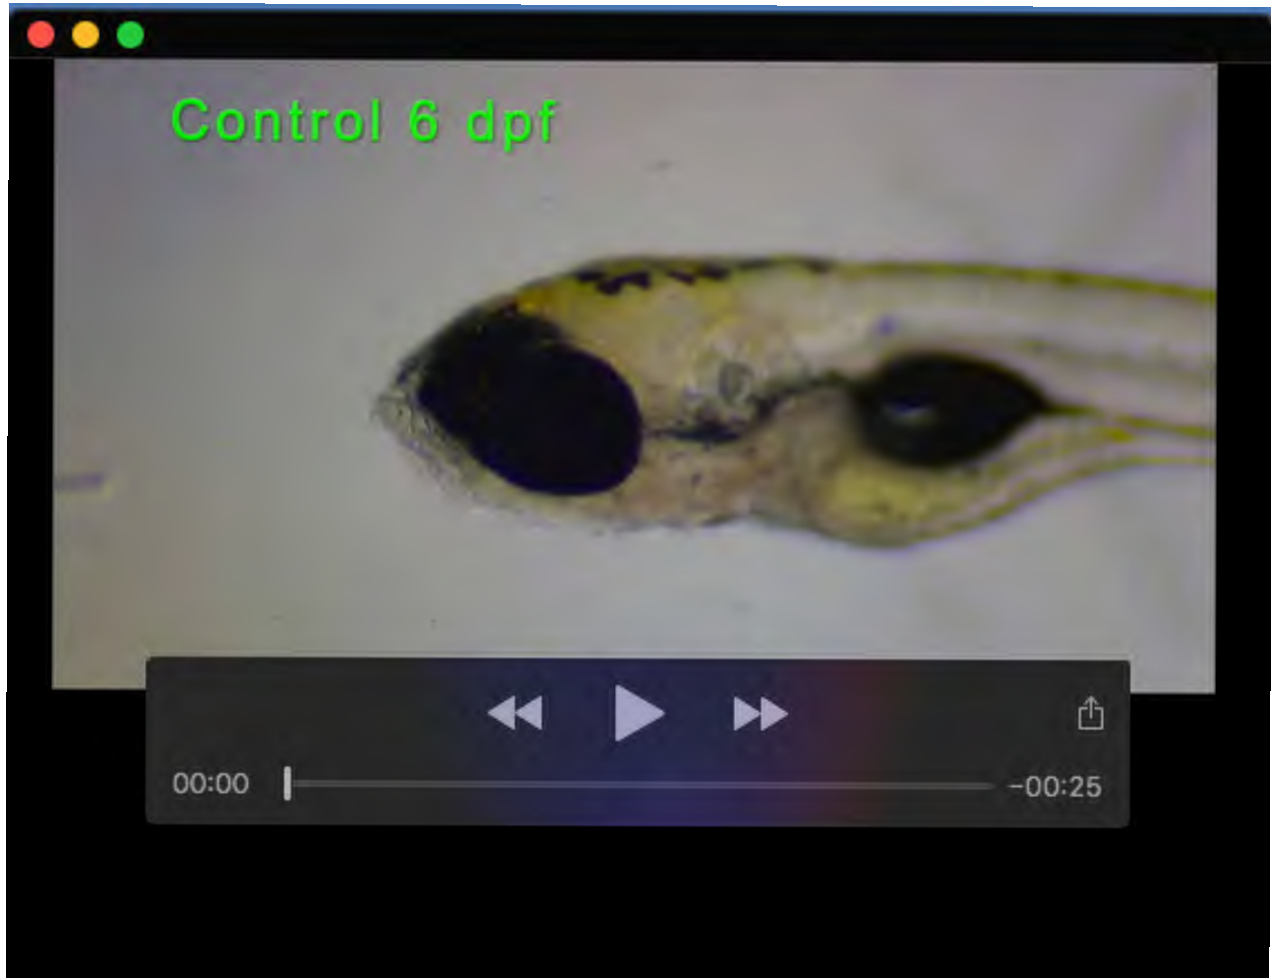

**Movie 2. Abnormal jaw gape in larvae with IrxAa and IrxAb loss.**
